# Supplementary material
Source: PubMed Central journal article supplement (PMC3460445)
Supplement: supp_M112.384578_jbc.M112.384578-4.pdf [file supp_M112.384578_jbc.M112.384578-4.pdf]

**SUPPLEMENTAL FIGURES**

**SUPPL. FIGURE 1.** TIGAR increases GSH levels. GSH assay was performed in T98G-neo or -TIGAR cells which were exposed to 0.1% O<sub>2</sub> for 20 h in the presence of 5 mM glucose in serum-free media (shown is mean ± SD of triplicates, one experiment out of two independent experiments with similar results is shown, \* p< 0.05, unpaired student t-test).

**SUPPL. FIGURE 2.** Pharmacological inhibition of glycolysis. (A and B) LNT-229p53<sup>V135A</sup> cells were treated with vehicle or 5 mM 2DG in the presence of 5 mM glucose in serum-free media and 5% O<sub>2</sub> for 20 h. Glucose consumption and lactate production were measured (shown is mean ± SD of triplicates, one experiment out of two independent experiments with similar results is shown, \*\* p<0.01, unpaired student t-test). (C) Cells were treated with 5 mM 2DG for 48 h and oxygen consumption was measured. A representative experiment out of 3 independent experiments with similar results is shown.

**SUPPL. FIGURE 3.** Oxidative phosphorylation is essential for TIGAR-expressing cells. (A) ATP assay was performed in T98G-neo and -TIGAR cells which were exposed to 5% O<sub>2</sub> for 24 h in the presence of 5 mM glucose in serum-free media and vehicle (control), 10 μM oligomycin or 10 mM methyl-pyruvate (CH<sub>3</sub>-pyruvate) (shown is mean ± SD of triplicates, one experiment out of 3 independent experiments with similar results is presented). ATP content of control-treated cells was set to 100%. (B) Oxygen consumption was measured in T98G-neo and -TIGAR cells which were exposed for 48 h to vehicle (control), 1 μM oligomycin or 10 mM methyl-pyruvate. A representative experiment out of 2 independent experiments with similar results is shown. (C) Cell death was assessed by LDH assay in T98G-neo and -TIGAR cells which were exposed to 5% O<sub>2</sub> for 24 h in the presence of 2 mM glucose in serum-free media and vehicle (control), 10 μM oligomycin or 10 mM methyl-pyruvate (shown is mean ± SD of triplicates, one experiment out of 3 independent experiments with similar results is presented). (\*\* p< 0.01, unpaired student t-test).
